# Ontogeny-Driven *rDNA* Rearrangement, Methylation, and Transcription, and Paternal Influence

Yih-Horng Shiao<sup>1\*</sup>, Robert M. Leighty<sup>2</sup>, Cuiju Wang<sup>1‡</sup>, Xin Ge<sup>3</sup>, Erik B. Crawford<sup>1</sup>, Joshua M. Spurrier<sup>1</sup>, Sean D. McCann<sup>1</sup>, Janet R. Fields<sup>1</sup>, Laura Fornwald<sup>3</sup>, Lisa Riffle<sup>3</sup>, Craig Driver<sup>3</sup>, Octavio A. Quiñones<sup>2</sup>, Ralph E. Wilson<sup>4</sup>, Kazimierz S. Kasprzak<sup>1</sup>, Gregory S. Travlos<sup>4</sup>, W. Gregory Alvord<sup>2</sup>, Lucy M. Anderson<sup>1</sup>

**1** Laboratory of Comparative Carcinogenesis, National Cancer Institute at Frederick, Frederick, Maryland, United States of America, **2** Data Management Services Incorporated, Frederick, Maryland, United States of America, **3** Science Applications International Corporation-Frederick, Frederick, Maryland, United States of America, **4** National Toxicology Program, Research Triangle Park, North Carolina, United States of America

## Abstract

Gene rearrangement occurs during development in some cell types and this genome dynamics is modulated by intrinsic and extrinsic factors, including growth stimulants and nutrients. This raises a possibility that such structural change in the genome and its subsequent epigenetic modifications may also take place during mammalian ontogeny, a process undergoing finely orchestrated cell division and differentiation. We tested this hypothesis by comparing single nucleotide polymorphism-defined haplotype frequencies and DNA methylation of the *rDNA* multicopy gene between two mouse ontogenic stages and among three adult tissues of individual mice. Possible influences to the genetic and epigenetic dynamics by paternal exposures were also examined for Cr(III) and acid saline extrinsic factors. Variables derived from litters, individuals, and duplicate assays in large mouse populations were examined using linear mixed-effects model. We report here that active *rDNA* rearrangement, represented by changes of haplotype frequencies, arises during ontogenic progression from day 8 embryos to 6-week adult mice as well as in different tissue lineages and is modifiable by paternal exposures. The *rDNA* methylation levels were also altered in concordance with this ontogenic progression and were associated with *rDNA* haplotypes. Sperm showed highest level of methylation, followed by lungs and livers, and preferentially selected haplotypes that are positively associated with methylation. Livers, maintaining lower levels of *rDNA* methylation compared with lungs, expressed more *rRNA* transcript. *In vitro* transcription demonstrated haplotype-dependent *rRNA* expression. Thus, the genome is also dynamic during mammalian ontogeny and its rearrangement may trigger epigenetic changes and subsequent transcriptional controls, that are further influenced by paternal exposures.

**Citation:** Shiao Y-H, Leighty RM, Wang C, Ge X, Crawford EB, et al. (2011) Ontogeny-Driven *rDNA* Rearrangement, Methylation, and Transcription, and Paternal Influence. PLoS ONE 6(7): e22266. doi:10.1371/journal.pone.0022266

**Editor:** Arthur J. Lustig, Tulane University Health Sciences Center, United States of America

**Received:** February 2, 2011; **Accepted:** June 21, 2011; **Published:** July 12, 2011

This is an open-access article, free of all copyright, and may be freely reproduced, distributed, transmitted, modified, built upon, or otherwise used by anyone for any lawful purpose. The work is made available under the Creative Commons CC0 public domain dedication.

**Funding:** This research was supported in part by the Intramural Research Program of the NIH, National Cancer Institute, Center for Cancer Research. This project was also funded in part with Federal funds from the National Cancer Institute, National Institutes of Health, under Contract No. HHSN261200800001E. The funders had no role in study design, data collection and analysis, decision to publish, or preparation of the manuscript. No additional external funding received for this study.

**Competing Interests:** The authors have the following competing interests: Robert M. Leighty, Octavio A. Quiñones and W. Gregory Alvord are employees of Data Management Services Incorporated and Xin Ge, Laura Fornwald, Lisa Riffle and Craig Driver are employees of SAIC-Frederick. There are no patents, products in development or marketed products to declare. This does not alter the authors' adherence to all the PLoS ONE policies on sharing data and materials, as detailed online in the guide for authors.

\* E-mail: shiaoy@mail.nih.gov

‡ Current address: Department of Gynecology Ultrasound, The Fourth Hospital of Hebei Medical University, Shijiazhuang, People's Republic of China

## Introduction

Gene rearrangement is required for development in selected cell types, such as mating-type switch in yeasts, diversification of variant surface glycoprotein in trypanosomes, amplifications of chorion protein genes for eggshell production in *Drosophila*, and maturation of B lymphocytes in humans [1]. Environmental stresses are capable of modulating these events and many of the programmed gene rearrangements, for examples, inversion control of flagellar protein in *Salmonella* and deletion/inversion of V(D)J immunoglobulin gene in mammals, are known to alter gene transcription [2]. Environmental stress responses that are transmissible to following generation(s) via genetic and epigenetic mechanisms have been detected in many organisms, including bacteria, fungi, plants, invertebrates, and mammals [3–5]. The *rDNA* gene, tandemly repeated in multiple

chromosomes in many unicellular and multicellular organisms [6], is a hotspot area for homologous recombination [7,8]. Amplification of the *rDNA* repeats is observed during oogenesis in *Xenopus* and macronuclear development in *Tetrahymena* [1]. Direct allelic reduction of the *rDNA* repeats in *Drosophila* lessened heterochromatin formation and gene silencing in unlinked genes elsewhere in the genome [9], suggesting a fundamental role of the *rDNA* structure change and its transcriptional regulation in organismal development. It is unclear whether the same *rDNA* rearrangement-mediated genomic controls also operate in mammalian ontogeny and how paternal exposures shape the processes.

In this study, we examined the roles of the *rDNA* genetic and epigenetic dynamics in mouse ontogeny and effects of two paternal stressors, namely, intraperitoneal injection of Cr(III) or acidic saline at a postmeiotic male germ-cell stage. The paternal treatment was

to test the hypothesis that father experience may be transmissible to offspring. Furthermore, these genetic and epigenetic information may offer a clue to our previous findings of increased tumor incidence and changes in expression profile in the offspring following paternal treatment with Cr(III), compared with acid saline as a control [10,11]. Cr(III) is known to reduce blood glucose [12]. Acidic saline is considered here as an independent stressor because it mimics peritoneal acidosis [13]. Putative structural rearrangements of the *rDNA* multiple-copy gene were determined by genotyping of haplotypes [14]. Since *rDNA* structural alteration is able to remodel epigenetic marks [9], the *rDNA* methylation was also quantified concurrently to determine epigenotype established along with ontogenic DNA replication and cell division. If *rDNA* rearrangement occurs, the haplotype frequency and epigenotype are likely to be varied throughout ontogeny. The levels of the 47S pre-*rRNA*, the precursor of *rRNA* biogenesis, were further measured in adult tissues as a functional output of *rDNA* genotype and epigenotype.

## Results and Discussion

### Changes of *rDNA* haplotype frequency and methylation during ontogeny

Pyrosequencing-based quantitative assays with a manufacturer-determined resolution of less than 5% were used to quantify single nucleotide polymorphism (SNP) frequencies and DNA methylation in the *rDNA* repeats in this large study of thousands of samples. This sequencing-by-synthesis technique provides an advantage to detect small population of sequence variant directly from amplified DNA segments [15]. The standard deviation for duplicate analyses here ranged from 1.25% to 3.97%. In addition to the G/T polymorphism in the spacer promoter, the relative frequencies of four sequence variants or haplotypes, defined by three SNPs in the primary gene promoter that were identified in the current study (Figure 1), were measured to detect *rDNA* rearrangement. Variants of ACC, CGC, CCA, and CCC sequences (GenBank accession JF262063, JF262064, JF262065, and JF262066, respectively) were detected with a combined frequency of about 99% out of over 160 DNA clones from 19 mouse sperm samples. Predominant and consistent presences of ACC, CGC, CCA, and CCC among 8 hypothetical haplotypes from 2 SNPs each at 3 sites support unequal homologous recombination, a known major recombination event for *rDNA* repeats [7], not gene conversion. For epigenotype, the percentages of DNA methylation at CpG 19 to 23 sites, representative of a total 27 CpG dinucleotides in a region of the spacer promoter (Figure 1A, see also Materials and Methods) were quantified in the same DNA samples for SNP genotyping.

To test the hypothesis that *rDNA* gene rearrangements and methylation changes occur during ontogeny, within-litter genetic and epigenetic variances, instead of means or medians, were compared between two developmental stages. The variance among siblings within a litter would remain constant throughout development if the genome and epigenome are permanently established after fertilization. Although tissues at different developmental stages from same individuals cannot be obtained here, litter-based analyses among populations provide an alternative method. Strikingly, we observed lower genetic and epigenetic variances in nearly all 98 litters of day-8 (E8) embryos compared with tissues in 93 litters of 6-week adult offspring (Figure 2 and S1). The differences of most within-litter variances between these two developmental stages were highly significant in all experimental groups ( $p < 0.0004$ , Data S1). Changes of the variances support that *rDNA* structure and methylation are altered during ontogenic

progression from the E8 embryo stage to 6-week adult mice. Furthermore, intraperitoneal injection of Cr(III) or acid saline in the fathers often modified the within-litter variances of the *rDNA* genetic and/or epigenetic traits (Data S1). One or more *rDNA* haplotypes were targeted for modulation of genetic diversity among siblings at various stages of development following paternal treatment with Cr(III) or acid saline and the E8 embryo stage was most frequently affected. In contrast, modifications of *rDNA* methylation diversity among siblings, including increases in E8 embryos in both genders and in female adult livers as well as a decrease in male adult lungs, were primarily observed in offspring from acid saline-treated fathers. These findings demonstrated that the genome is a dynamic molecule, constantly modified at genetic and epigenetic levels in response to normal ontogeny and further influenced by paternal exposures.

### Haplotype-dependent methylation

Since only a fraction of *rDNA* repeats is methylated [16], we examined possible haplotype-specific methylation patterns. There were significant associations of T haplotype with hypomethylation as evidenced by population average regression slopes for all tissues (Data S2), which were subsequently confirmed by bisulfite-sequencing (Figure 3). The T-associated hypomethylation in adult sperm also provides a validation to our previous finding in another set of sperm [17]. Similar haplotype-dependent methylation was further detected for CGC (negative association) and CCC (positive association) during normal ontogeny in untreated group except at E8 embryo stage ( $p < 0.003$ , Data S2). A transit inverse association of CCA with methylation was seen in sperm of untreated mice. Paternal treatment with acid saline, in particular, induced de novo association of methylation with ACC (negative) at both E8 embryo and 6-week adult stages, and with CCA (positive) in adult tissues. The effects of Cr(III) on ACC and CCA haplotypes were strictly limited to female lungs. Taken together, these findings suggest that selected haplotype sequences or SNPs determine the degrees of *rDNA* methylation. Such haplotype-related methylations are modifiable during development and following paternal treatment with Cr(III) or acid saline. It is likely that haplotype-dependent methylation is regulated at multiple levels, including promoter sequence and other yet-to-be identified mechanisms.

### Unequal *rDNA* genotype and epigenotype among tissue lineages

The above evidence of *rDNA* rearrangement and methylation change during developmental progression from E8 embryos to 6-week adult mice prompted us to determine whether such genetic and epigenetic modifications also occur in differentiation of tissue lineages. Indeed, direct comparisons of tissues from individual mice revealed that frequencies of several haplotypes and methylation levels of the *rDNA* repeats are often unequal among fully differentiated tissues ( $p < 0.005$ , Data S3), recapitulating the dynamic nature of the *rDNA* repeats. The shifts of the genetic and epigenetic differences between tissue pairs, away from the zero reference lines, were clearly demonstrated (Figure 4 and S2). Many mice (acidic saline: 30.3–58.8%; Cr: 23.6–62.1%; untreated: 43.7–70.5%) showed tissue-to-tissue difference of more than 5% unit in frequency of at least one haplotype or in *rDNA* methylation, a chosen threshold larger than the standard deviation of 1.25% to 3.97% from duplicate assays, as described above. The tissue-differential *rDNA* methylation mirrors a report showing variably methylated regions among tissues in mice and humans [18]. Frequent observation of differential genotype between sperm and two somatic cells (lung and liver) is consistent with genetic rearrangement contributed by meiotic recombination during

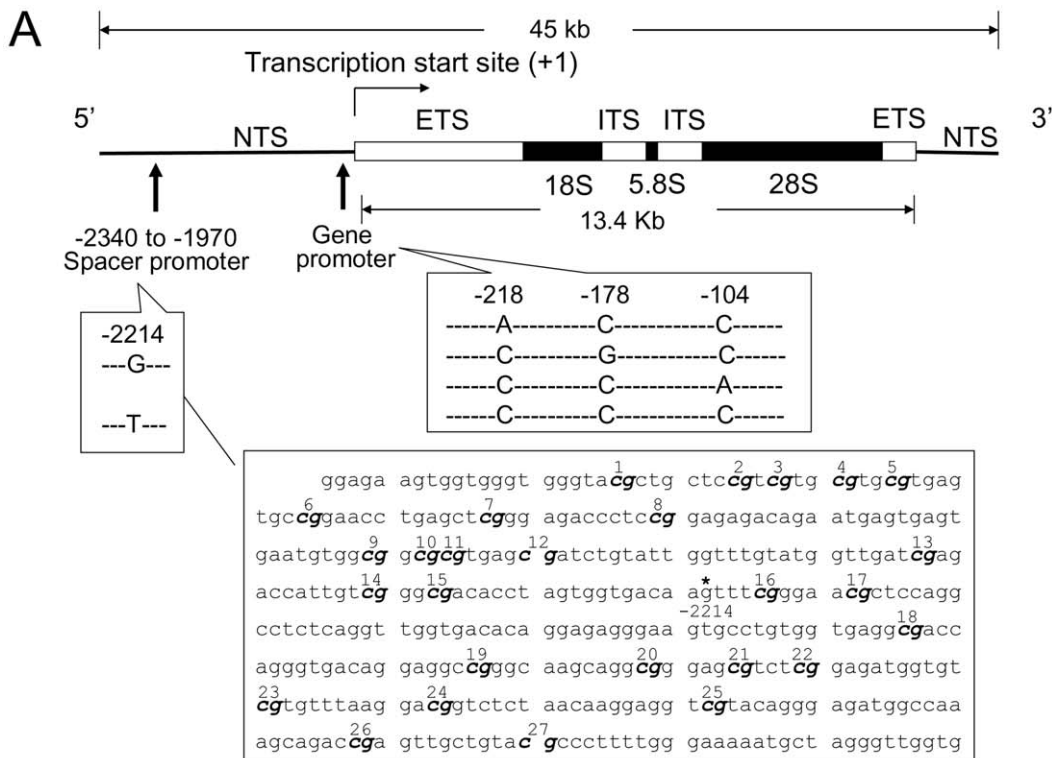

**B**

|              |       |            |                          |                          |                          |                     |
|--------------|-------|------------|--------------------------|--------------------------|--------------------------|---------------------|
| BK000964     | 45061 | acgtctgagg | ccgagggaaa               | gctatggg                 | cggttttctt               | tcattgacct          |
| Cr:NIH Swiss | -248  | -----      | -----                    | -----                    | ----- <sup>M</sup> ----- | -----               |
| BK000964     | 45111 | gtcggcttta | tcagttctcc               | gggttgtcag               | ggtcgaccag               | ttgttccttt          |
| Cr:NIH Swiss | -198  | -----      | ----- <sup>S</sup> ----- | ----- <sup>*</sup> ----- | -----                    | -----               |
| BK000964     | 45161 | gaggtccggt | tcttttctgt               | atggggtcat               | ttttgggcca               | cctccccagg          |
| Cr:NIH Swiss | -149  | -----      | -----                    | -----                    | ----- <sup>M</sup> ----- | -----               |
| BK000964     | 45211 | tatgacttcc | aggcgtcgtt               | gctcgctctg               | cactttctctc              | cctgtctctt          |
| Cr:NIH Swiss | -99   | -----      | ---tattctc               | tgtg-----                | -----                    | -----               |
| BK000964     | 45261 | ttatgcttgt | gatcttttct               | atctgttctt               | attggacctg               | gagataggt           |
| Cr:NIH Swiss | -49   | -----      | -----                    | -----                    | -----                    | ----- <sup>-1</sup> |
| BK000964     | 1     | actgacacgc | tgtcctttcc               |                          |                          |                     |
| Cr:NIH Swiss | 1     | -----      | -----                    |                          |                          |                     |

**Figure 1. The mouse rDNA gene.** (A) Locations of CpG sites and G/T SNP in a spacer promoter region (–2340 to –1946) and 4 sequence variants (haplotypes) with unique SNP combinations in the gene promoter. \*G/T SNP; NTS: nontranscribed spacer; ETS: external transcribed spacer; ITS: internal transcribed spacer. (B) Sequence alignment of a Cr:NIH Swiss rDNA gene promoter region, upstream of the transcription start site 1, to the GenBank BK000964. The Cr:NIH Swiss sequence was obtained by cloning and dideoxy sequencing (M: A/C SNP; S: C/G SNP; \*deletion). doi:10.1371/journal.pone.0022266.g001

spermatogenesis. These ontogeny-related genetic and epigenetic diversities were further modified by paternal injection of Cr(III) or acidic saline (Data S3). One or more haplotypes were targeted for enlargement of the differences among tissues except lung versus liver in male mice. The paternal effects were also observed for rDNA methylation in female lung/liver and male lung/sperm pairs.

It is noteworthy that sperm had the highest rDNA methylation level among three tissues, followed by lung and liver (Figure 4). The high rDNA methylation in sperm is consistent with decreases of hypomethylated haplotypes (T, ACC, and/or CGC, Data S2) but increases of those associated with hypermethylation (CCA

and/or CCC). In contrast, the low rDNA methylation in livers was accompanied with more hypomethylated but less hypermethylated haplotypes compared with lungs and sperm. Low rDNA methylation is known to enact rRNA transcription [19]. As predicted, livers expressed higher levels of the 47S pre-rRNA than lungs from same mice (Figure 5).

#### Differential transcription and methylation of rDNA haplotypes

Preferential selection of hypomethylated rDNA haplotype and more rRNA level in livers, compared with lungs, suggests that the

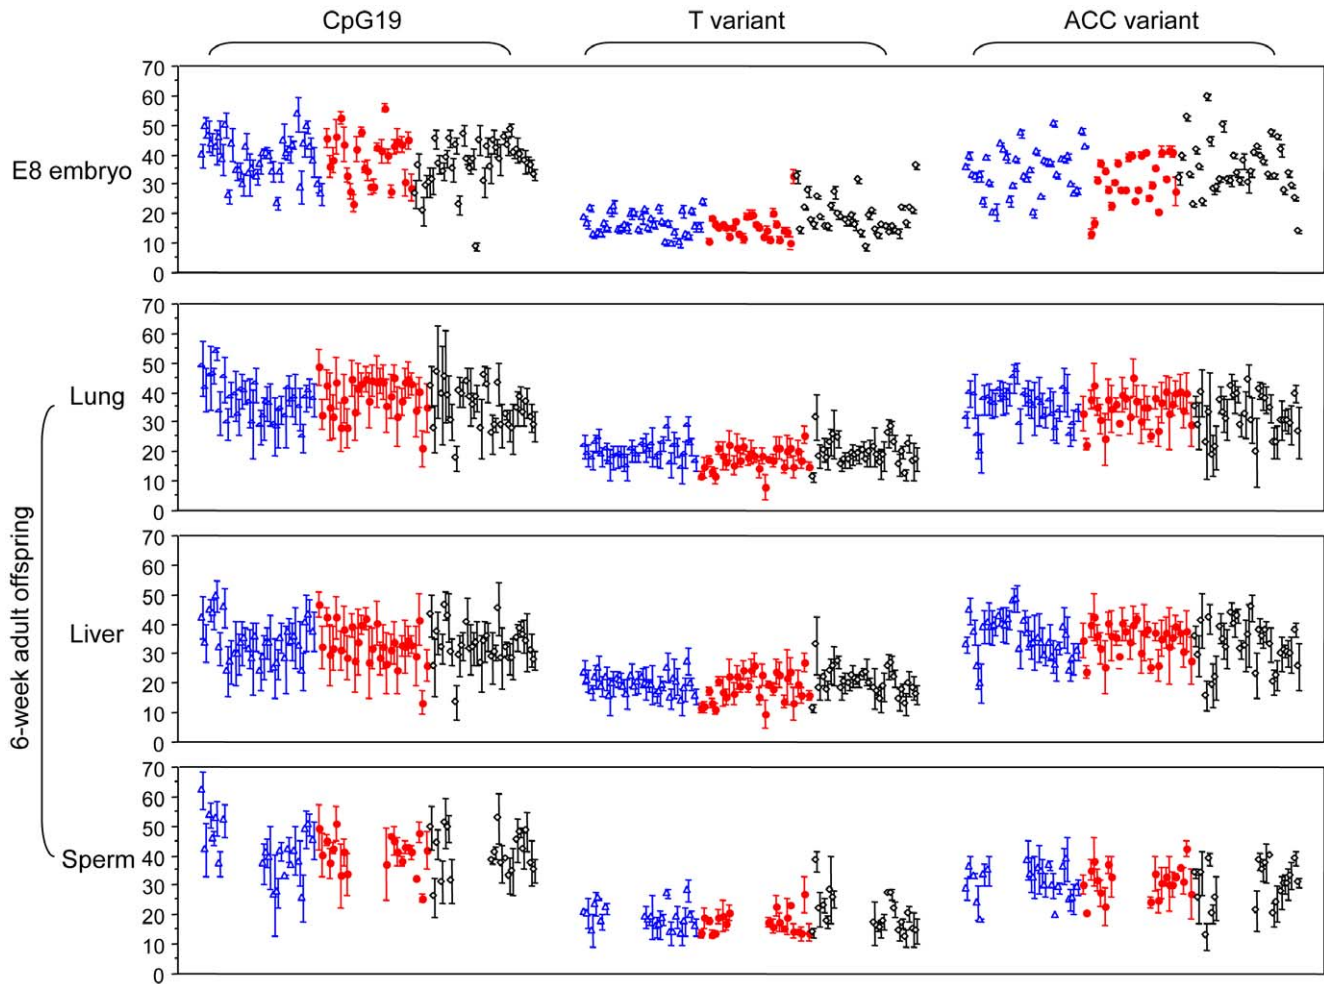

**Figure 2. Increase of littermate-to-littermate variation during ontogeny.** Within-litter variation, represented by error bars, of *rDNA* haplotype frequencies (% T and ACC) and CpG19 methylation (%) widened from E8 embryos to 6-week adult tissues in 3 paternal treatment lineages (genders combined; blue: acidic saline; red: Cr; black: untreated). The average litter size is 9 at E8 embryo and 8 at 6-week adult stage. The plots are displayed as mean  $\pm$  1x standard deviation to illustrate the degree of variation. doi:10.1371/journal.pone.0022266.g002

SNPs in the *rDNA* gene promoter may in theory control *rRNA* transcription. *In vitro* transcription was initiated by incubating DNA constructs with identifiable SNPs for 4 haplotypes (ACC, CGC, CCA, and CCC) in a mouse nuclear extract to test the hypothesis (Figure 6A). The relative level of *rRNA* transcript for each haplotype was normalized with that of *rDNA* template, remained at low quantity and amplified from the same samples, to correct for variation of pyrosequencing signal among the 4 identification sites (Figure 6B). The mean corrected ratios, 1.08, 1.00, 1.00, and 0.91 (equivalent to 27.0%, 25.0%, 25.0%, and 22.8%) were obtained for ACC, CGC, CCA, and CCC, respectively, indicative of the relative abundance of *rRNA* transcripts in the following order, ACC>CGC=CCA>CCC. The difference, either ACC or CGC versus CCC, reached statistical significance. This is consistent with the above observation that livers tend to maximize *rRNA* output by selecting more CGC haplotype but less CCC than lungs (Figure 4 and S2).

It has been shown that methylation of naked *rDNA* without chromatin assembly did not alter *rRNA* transcription [19]; however, the haplotype constructs provide useful materials to test if methylation is directly regulated by DNA sequence. Two CpG sites in the *rDNA* promoter of each haplotype after *in vitro*

transcription reaction were examined and intriguingly the level of methylation was dependent on the CpG site and haplotype sequence (Figure 6C). Preferential methylation was detected at -133 CpG compared with the -143 site and the CCA haplotype was nearly unmethylated. Methylation of the single CpG site at -133 is known to silence *rRNA* transcription *in vivo* or *in vitro* with chromatin assembly [19]. A slight, about 3–4%, but significant methylation of ACC, CGC, and CCC at the -133 CpG in nuclear extract suggests that these haplotypes are directly accessible to methyltransferase(s) and subjected to methylation modification. In contrast, the CCA may follow different mechanism. This prediction is supported by the above observation of nonlinear association of methylation with CCA, namely, negative association in sperm of untreated mice, no association in E8 embryos and adult tissues of untreated group, but positive association in adult offspring after paternal treatment with acid saline (Data S2).

We demonstrated here that the genome is dynamic throughout normal ontogenic processes and is also subjected to modulation by paternal exposures. The consequences of *rDNA* rearrangement during ontogenic cell division and differentiation potentially include changes in *rDNA* methylation and *rRNA* transcription. Observations of tissue-specific *rDNA* haplotype frequencies, *rDNA*

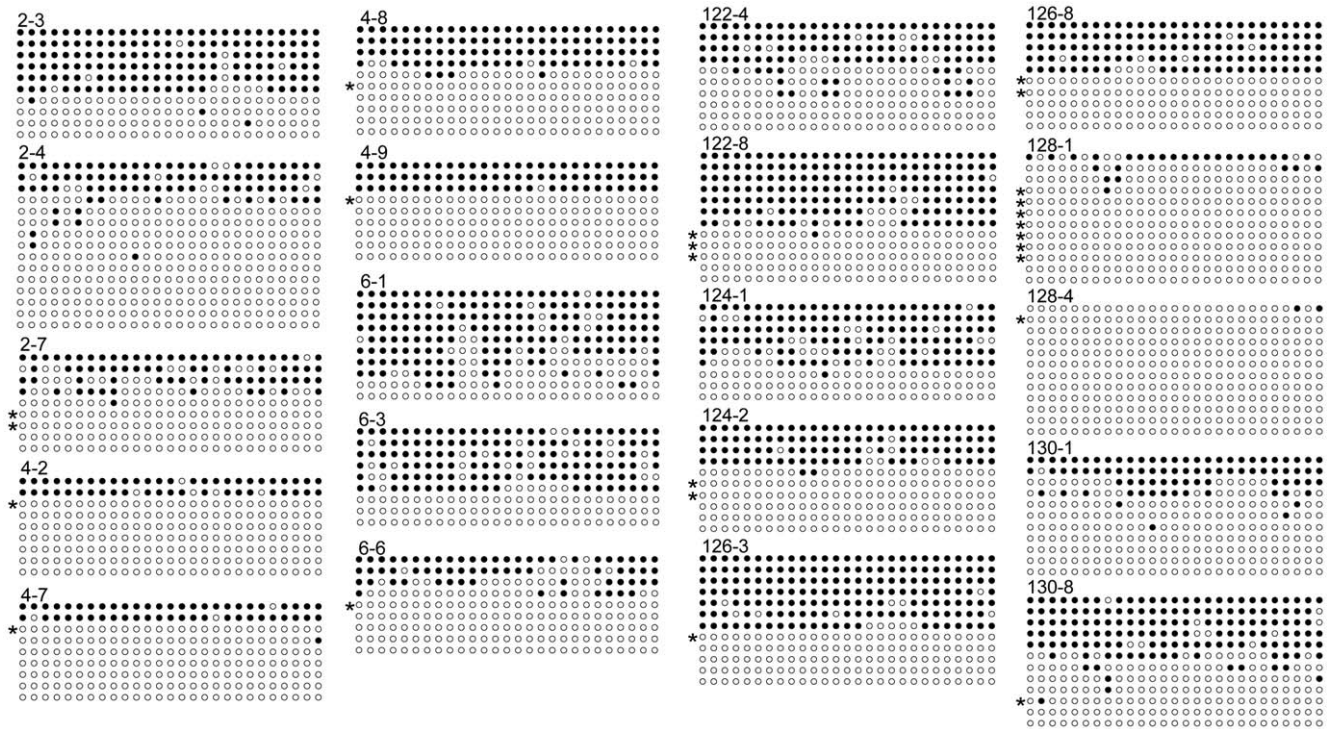

**Figure 3. Bisulfite-sequencing of the 27 CpG sites in the rDNA spacer promoter region.** A total of 20 E8 embryos, identified by hyphenated numbers, were examined (filled circle = methylation). \*Denotes the T haplotype identified by the -2214 G/T SNP in Figure 1A. doi:10.1371/journal.pone.0022266.g003

methylation, and rRNA transcription provide further evidence that the rDNA rearrangement may participate in normal ontogeny, as proposed in Figure 7. The role of rRNA biogenesis in cell lineage decision has been documented in various model systems. It has been shown that transcription of the rDNA to rRNA is a rate-limiting factor for ribosomal biogenesis [20], which is also required for cell cycle progression in several cell lineages [21]. Correct rRNA processing is essential for regulation of renewals and differentiations of asymmetrically segregated germline stem cells and neuroblasts in *Drosophila* [22]. The rDNA gene has been also associated with cancers [23,24], aging [25], neurodegenerative diseases [26,27], and psychiatric disorders [28]. Unequal sister chromatid recombination, initiated by RNA polymerase II transcription within the intergenic region of the rDNA, has been shown to trigger amplification of rDNA copies in yeast [29]. Similar hypomethylation-induced RNA polymerase II-mediated increase of epichromosomal rDNA, indicative of amplification, was also seen in human cells [24]. Our observations of serial epigenetic and transcriptional changes after rDNA rearrangement support the key function of the rDNA repeats in organismal ontogeny and disease processes.

**Materials and Methods**

**Ethics statement**

All animals used in this research project were cared for and used humanely according to the following policies: The U.S. Public Health Service Policy on Humane Care and Use of Animals (1996) and the U.S. Government Principles for Utilization and Care of Vertebrate Animals Used in Testing, Research, and Training (1985). The animal studies (01-32H, 04-037H, 04-037J, 04-037K, and 04-037M) were approved by National Cancer Institute-Frederick Animal Care and Use Committee.

**Animal treatment**

Outbred male Cr:NIH Swiss mice were obtained from the National Cancer Institute-Frederick Animal Production Area at 6 weeks of age, housed for 2 weeks, and were injected intraperitoneally with 1 mmol/kg CrCl<sub>3</sub>·6H<sub>2</sub>O in 0.5 ml 0.9% NaCl adjusted to pH 4.0 with NaOH or HCl-acidified saline alone (pH 4). The glucose-lowering efficiency of the current Cr(III) regimen was validated (Figure S3). For acquisition of sperm from direct exposure, two separate series of 20 and 25 males respectively were treated, and 2 wks later the epididymides from mice (41 in Cr(III), 44 in acidic saline, and 43 in untreated groups) were frozen for sperm isolation. For the preconceptional studies, the male mice were treated with Cr(III), acidic saline, or nothing, as described above, and mated with untreated females 2 weeks after treatments. In order to minimize batch-related effects, such as seasonal changes, suggested by previous investigators [30], several experimental batches were utilized. A total of 876 E8 embryos were collected from 26 litters in Cr(III) group, 36 litters in acidic saline group, and 36 litters in no treatment group, as two experimental batches over one year. Tissues (lung, liver, and epididymides) from 6-week adult offspring were obtained from three different experimental series except epididymides from only two, carried out over 18 months. A total of 758 offspring from 31 Cr(III) group litters, 32 acidic saline group litters, and 30 no treatment group litters comprised this part of the study.

**DNA extraction and bisulfite treatment**

DNAs of entire E8 embryos and 6-week old offspring lung and liver were extracted using Easy-DNA kits (Invitrogen, Carlsbad, CA). Epididymides were minced in phosphate-buffered normal saline. After precipitation of tissue debris by gravity, the sperm in the supernatant were transferred for subsequent sonication to

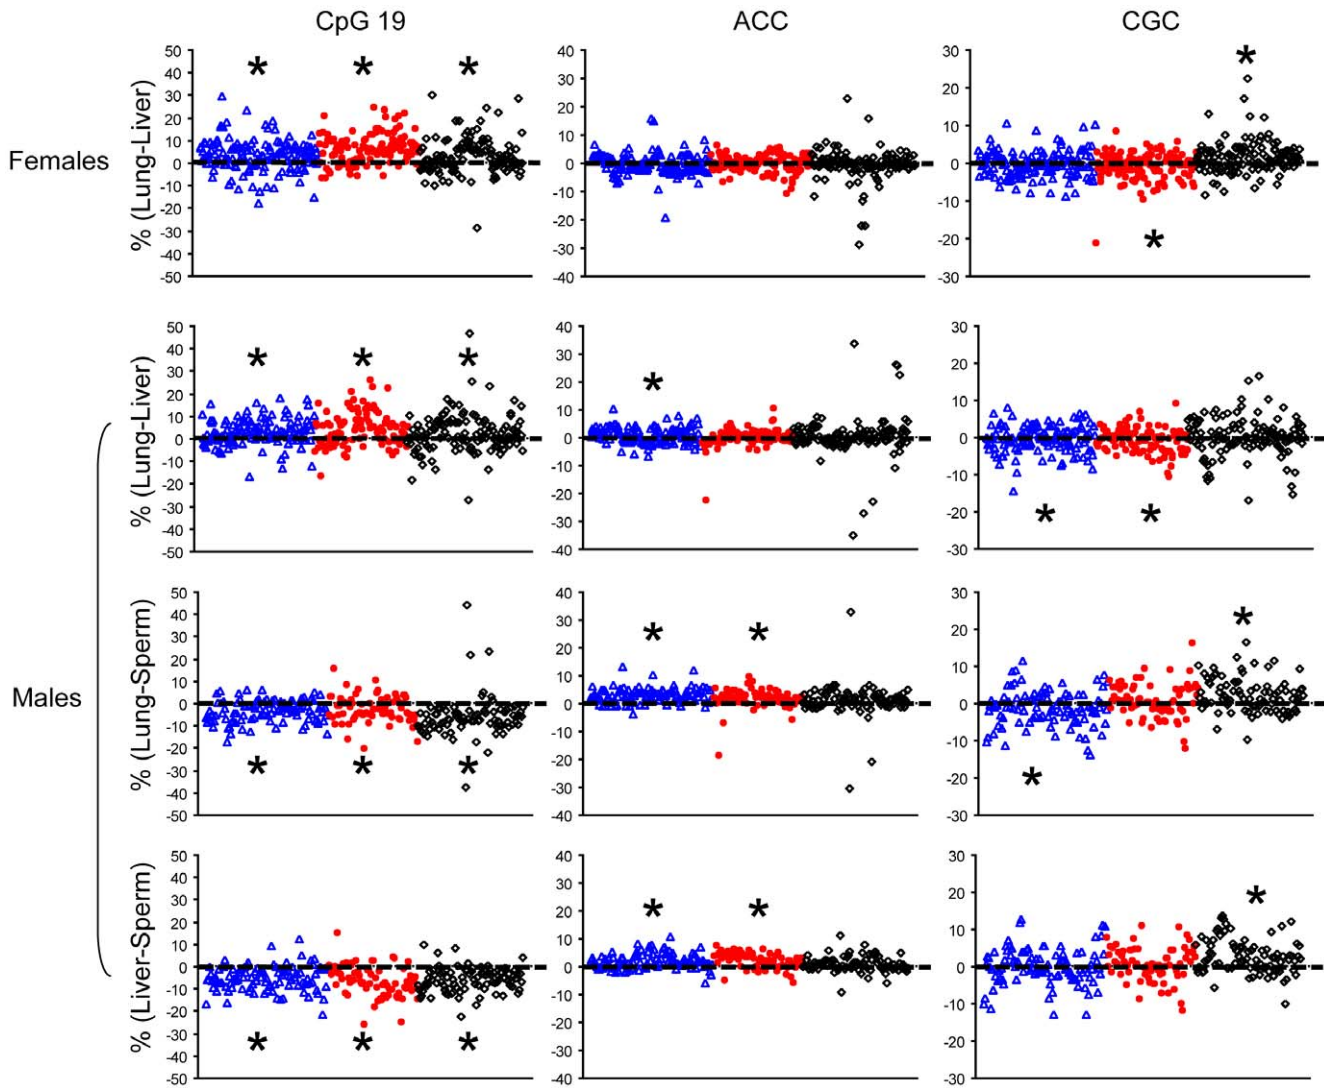

**Figure 4. Genetic and epigenetic differences among adult offspring tissues.** The arithmetic differences (y-axis) of *rDNA* sequence variant frequency (% ACC and CGC) and CpG19 methylation (%) between two 6-week adult tissues of the same animals were plotted. Deviations of the differences from a reference line, of an identity with zero difference, were frequently detected in 3 paternal treatment lineages (blue: acidic saline; red: Cr; black: untreated). \*Denotes statistical significance in paired difference between tissues of the same mice in each treatment group and identifies positive/negative mean differences by its location above/below the zero reference line (see Data S3 for p values). The standard error lines are omitted to provide clear view of the scatter plot. doi:10.1371/journal.pone.0022266.g004

destroy cells of non-sperm origin. Sperm heads were then pelleted by centrifugation at 1,000× g and DNA was extracted using proteinase K with the presence of dithiothreitol, as described previously [11,17]. About 500 ng of genomic DNA were used for bisulfite treatment according to a previously established protocol [11,17].

**Quantification of DNA methylation and sequence variants**

The bisulfite-modified sense strands of the *rDNA* spacer promoter (GenBank Accession BK000964) were amplified by real-time polymerase chain reactions (PCRs), using forward primer: ggaagtgtttggtgagg and a biotinylated reverse primer: biotin-caccaaccctaacttttcc. In brief, 5 or 10 μl of modified genomic DNA was used in a final 50 μl reaction containing 0.5 μM primers and 1× QuantiTect SYBR Green PCR mix

(Qiagen, Valencia, CA). PCR was performed with an initial denaturation at 95°C for 15 minutes followed by 35 cycles of denaturation (94°C, for 10 s), annealing (50°C, 30 s), and extension (72°C, 30 s) in a Chromo4 real-time system (Bio-Rad, Hercules, CA). Regions of the *rDNA* spacer and main gene promoters were amplified using forward/reverse primers, biotin-gcgtgagcgtctgta/ctggtcgctcaccacag and tctgaggccgagggaagc-ta/biotin-ggaaagtgcacaggccacagagaat, respectively. The PCR conditions were the same as described above, except that 50 ng unmodified DNA, annealing at 60°C, and amplification for a total of 30 cycles were applied. Entire PCR products were used directly for pyrosequencing to obtain representative estimation from >200 *rDNA* copies in mouse genome. The percentages of methylation in the spacer promoter and of SNPs in both spacer- and main gene promoters were quantified by pyrosequencing using 4 primers in the PyroMark MD system (Biotage, Foxboro, MA). For DNA

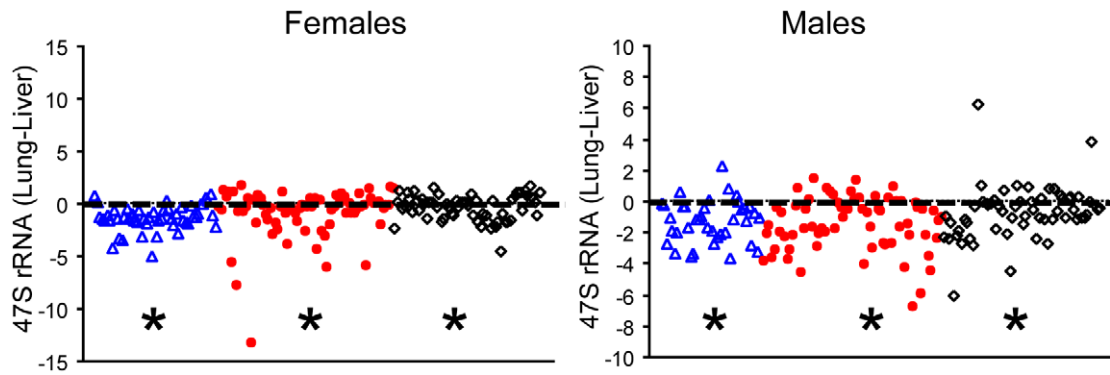

**Figure 5. Differential *rRNA* level between tissues.** The scatter plot of arithmetic difference (y-axis) between lungs and livers of individual mice in 3 paternal treatment lineages shows higher *rRNA* level in livers compared with lungs (blue: acidic saline; red: Cr; black: untreated). \*Denotes  $p < 0.003$  (paired T test) and identifies positive/negative mean differences by its location above/below the zero reference line. doi:10.1371/journal.pone.0022266.g005

methylation, initial assay covered 9 CpG sites as described previously [17]. Since the levels of methylation were parallel across these sites among the three treatment groups, subsequent assays focused on the 19–23 CpG sites. These 5 CpG sites were examined by the gattaggtgataggag primer in a single reaction. The T/G SNP at  $-2214$  in the spacer promoter, reported before [17], was measured by the ctgatcaaccatacaaa primer. The same PCR products from the main gene promoter region were used for two pyrosequencing reactions. The ggaaagctatgggagc primer was used to interrogate SNPs A/C at  $-218$  and C/G at  $-178$ , and the ttgggccacctcc primer for C/A SNP at  $-104$ . These sequence variants were deposited in GenBank (see also Figure 1B). The frequencies of ACC, CGC, and CCA were obtained directly from the percentages of A/C, C/G, and C/A SNPs, respectively. The CCC frequency was calculated by subtraction of the total of ACC, CGC, and CCA percentages from 100. Independently repeated PCR and pyrosequencing were performed to acquire duplicated values for statistical analyses.

### Cloning and dideoxy DNA sequencing

Cloning was performed using a TOPO Cloning kit (Invitrogen Co.) to obtain individual sequence clones for Sanger's dideoxy DNA sequencing. The bacteria colonies carrying plasmids of the PCR product inserts flanked by the primers, gagcttggatctattttttt-taatttttct/gcgacagaccaagccagtaaa for unmodified DNAs or gtttgagttgagggaagta/tcaatacctatctccaatccaata for bisulfite-modified templates, were positively selected in culture plates with the presence of ampicillin and kanamycin antibiotics.

### Gender typing

Genders of the E8 embryos were determined by real-time PCR using primers gtgagagccacaagtggc/ctctgttaggatctcaatctct for the *SRY* gene (GenBank NM\_011564) on the Y chromosome and primers aactaaatcaagactcaagcatg/tgtgcagagtataaatatggatc for the *X-inactivation center region* (GenBank AJ421478) on the X chromosome. The presence of X and/or Y chromosome(s) was detected by melting curves in the Chromo4 system (Bio-Rad).

### Quantification of the 47S pre-rRNA

Total RNA was isolated with the RNeasy Mini kit (Qiagen) according to the manufacturers' protocols. DNase treatment was performed to remove residual DNA from the RNA samples by use of the recombinant DNase I as specified in the protocol supplied with the Ambion DNA-free Kit (Applied Biosystems, Foster City,

CA). The treated samples were purified and a 40 ng total RNA was used for reverse transcription (RT) and quantitative PCR, as described previously [31]. In brief, RT was carried out using SuperScript III (Invitrogen) and gene-specific primers according to the manufacturer's protocol. The primer used for RT determination of a 5' *rRNA* Leader sequence region, indicative of the 47S pre-*rRNA* level, was gagacaaacctggaacg. PCR primer pair was: gttgagagtgcccagctactt/ggggcaagacagtactgata. One universal reference total RNA was included in every PCR run to obtain relative level of the 47S pre-rRNA before comparison across all samples.

### In vitro transcription

Four haplotype constructs were generated by PCR from pMA plasmids (GENEART, Regensburg, Germany) containing modified *rDNA* sequences ( $-248$  to  $+87$ , see Figure 1A and 6A) flanked by AscI and PacI restriction sites. Modifications of internal sequences (C to G at  $+6$ , A to C at  $+33$ , and deletion of AAA at  $+44$  to  $+46$  for all; substitutions of CCCT at  $+51$  to  $+54$  with TCTGTG, TGCGTG, TGTCTG, and TGTGCG for ACC, CGC, CCA, and CCC haplotype, respectively) were introduced to maximize specificity for pyrosequencing assay. The final products of 401 bps were amplified using a universal upper primer (gcc-gagggaagctatgg) and a haplotype-specific lower primer (gggagtgatgatgaaactggaagcgggcagtg for ACC; ggaggagtgagagtgactg-gaaagcgggcagtg for CGC; ggggatgtgatgtagactggaagcgggcagtg for CCA; ggtgtgaggaggagtagctggaagcgggcagtg for CCC). Equal amounts of the 401-bp haplotype constructs (10 ng each) were incubated with 25  $\mu$ g P19 mouse teratocarcinoma nuclear extract (Active Motif, Carlsbad, CA) supplemented with 0.5 mM ribonucleotides, 5 mM  $MgCl_2$ , 0.1 mM EDTA in a 20  $\mu$ l reaction for 60 minutes at  $30^\circ C$ , as described previously [32]. Total RNAs were purified by addition of TRIzol Reagent (Invitrogen), followed by spin-column capture using MEGAclear kit (Ambion, Austin, TX) and subsequently treated with DNase I (DNA-free kit, Ambion). The *rRNA* transcripts were reverse-transcribed utilizing SuperScript III (Invitrogen) and the actggaagcgggcagtg primer. PCR products, amplified with gacgtgtccttccctatt/biotin-gccagttctgtctccatta, were pyrosequenced using the cactacaggacactatgaga primer to quantify C/G, C/T, C/G, and C/T haplotype-specific SNPs at  $+49$  to  $+52$ . Residual *rDNA* constructs from each sample were also amplified after omitting reverse transcriptase in RT reaction but with intensity of  $>30$ -fold lower than the *rRNA* transcripts. For CpG methylation, a haplotype-specific primer (gggagtgatgatgaaattg for ACC, ggaggagtgagagtgattg for CGC, ggggatgtgatgtagattg for

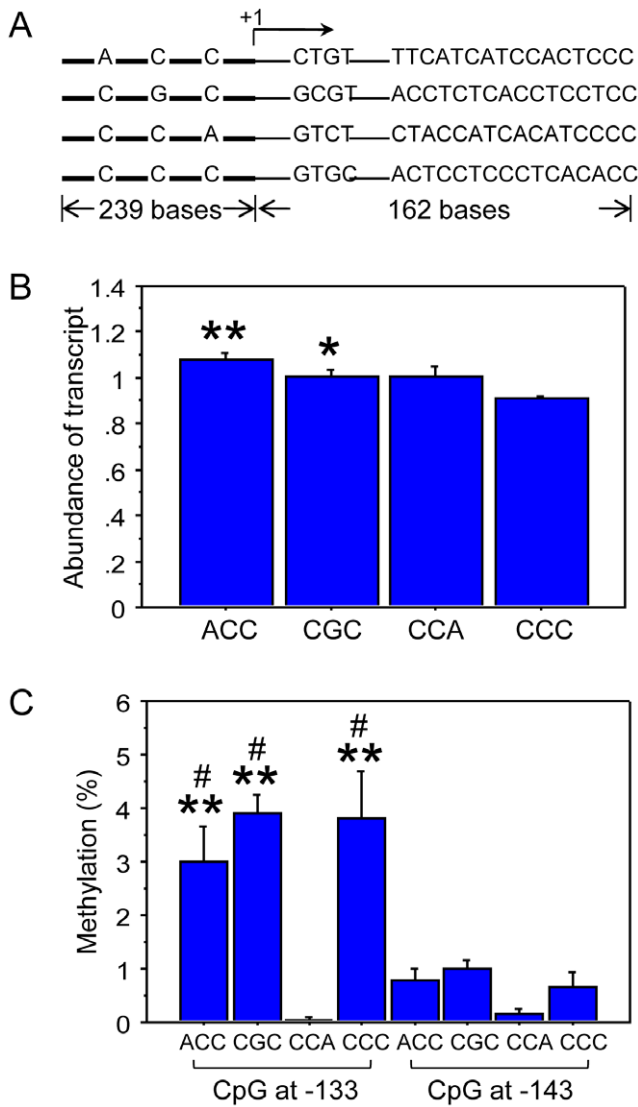

**Figure 6. Haplotype-related rRNA transcription and rDNA methylation in vitro.** (A) Four haplotype constructs carrying unique SNPs in the rDNA promoter region (bold line) and tetranucleotide identifications in rRNA transcripts (+1: transcription start site). The differential 3'-end sequences provide priming sites for haplotype-specific enrichment. (B) The relative abundance of each haplotype transcript corrected by that of rDNA template (4 independent measurements, \*p<0.05, \*\*p<0.01 compared with the CCC, unpaired T test). (C) The level of methylation in each of 4 haplotypes from the same sample in *in-vitro* transcription assay after subtraction of background that was measured in originally unmethylated haplotype construct (4 independent measurements, \*\*p<0.01 compared with the CCA, #p<0.05 compared with corresponding haplotype at the -143 site). doi:10.1371/journal.pone.0022266.g006

CCA, or ggtgtgaggaggagtattg for CCC) and a common lower primer (accaattattcctttaaatacc), were used to enrich individual haplotype from bisulfite-modified DNA with 7 cycles of PCR in separate reactions. A 1/100 dilution of PCR products was further amplified for 34 cycles using an upper primer (tggaagtattattgggagggt for ACC, CGC, and CCC haplotype; tggaagtattattgtggagggt for CCA) and the biotin-accaattattcctttaaatacc lower primer. Pyrosequencing primer, tggtttaaaaatgatttat, was used to interrogate methylation at -133 and -143 CpG sites.

**Statistical analysis**

Linear mixed-effects models were used to test for treatment differences [e.g., untreated, acidic saline, and Cr(III)] and to account for the effects of covariates, including sex of offspring, litter size, and experimental batch effects on response endpoints [33–35]. These models included both random and fixed effects. Random effects for litter were included in the model to account for correlation of responses between mice belonging to the same litter. Random effects for mouse within litter were also included to account for correlation of the replicate measurements made on the same mouse. The fixed effects included an analysis-of-variance (anova) component to model the effects of the treatments. F statistics were used to test for homogeneity of the mean responses across the treatments, and t statistics were used to make additional pairwise comparisons between the treatment means. Further analysis methods included correlation and regression, analysis of variance (anova), t-tests, Wilcoxon tests and tests for variance homogeneity. Probability values less than 0.05 were considered to be significant. All probability values were two sided.

**Supporting Information**

**Figure S1 Increase of littermate-to-littermate variation during ontogeny.** Within-litter variation, represented by error bar, of rDNA sequence variant frequencies (CGC, CCA, and CCC) widened from E8 embryos to 6-week adult tissues in 3 paternal treatment lineages (genders combined; blue: acidic saline; red: Cr; black: untreated). The plots are displayed as mean ± 1x standard deviation to illustrate the degree of variation. (TIF)

**Figure S2 Genetic differences among adult offspring tissues.** The arithmetic differences (y-axis) of rDNA sequence variant frequencies (% T, CCA, and CCC) between two 6-week adult tissues of the same animals were plotted. Deviations of the differences from a reference line, of an identity with zero difference, were frequently detected in 3 paternal treatment lineages (blue: acidic saline; red: Cr; black: untreated). \*Denotes statistical significance in paired difference between tissues of the same mice in each treatment group and identifies positive/negative mean differences by its location above/below the zero reference line (see Data S3 for p values). The standard error lines are omitted to provide clear view of the scatter plot. (TIF)

**Figure S3 Cr(III)- and acidic saline-induced acute phenotypic changes in male mice.** Body weight curves of breeding males (10 mice each) and serum glucose (19 or 20 mice each) of males 2 weeks after treatment (blue: acidic saline; red: Cr; black: untreated). \*Denotes p<0.01, two-sample T test, in reference to untreated group. Intraperitoneal injection of Cr(III) at week 8 resulted in acute weight loss. Acidic saline did not induce any weight loss or change of serum glucose. Body weights also dropped at the one week breeding period commencing at week 10 for all three experimental groups but recovered at week 12. The same results were reproduced from other batches of male mice. (TIF)

**Data S1 Equality of within-litter variances among E8 embryos and 6-week adult offspring tissues, and pairwise comparisons of treatments.** (DOC)

**Data S2 Mixed-effects model of regression slopes between CpG methylation and sequence variants.** (DOC)



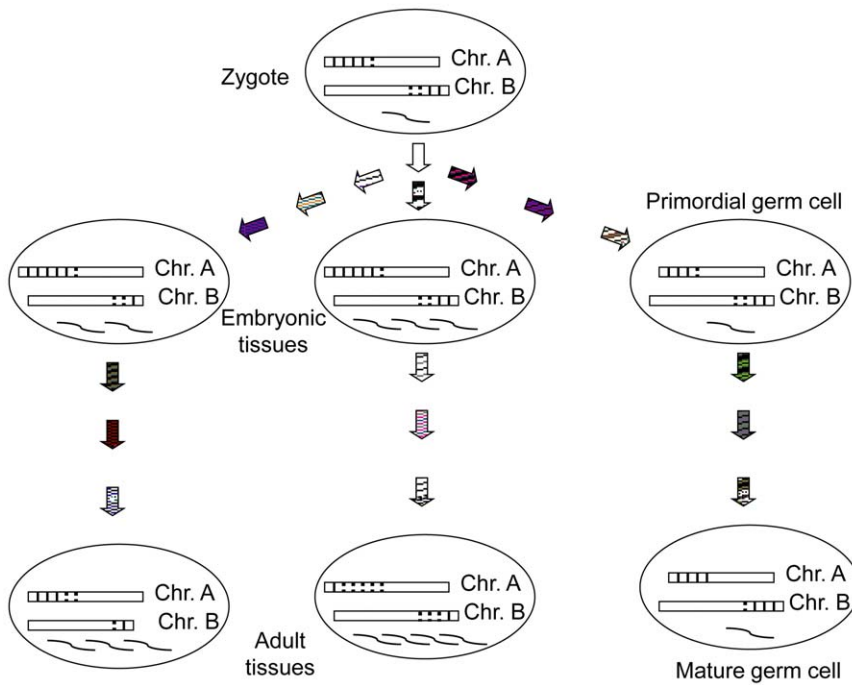

**Figure 7. Proposed model for ontogeny-induced rDNA rearrangement, methylation, and transcription.** Different cell lineages undergo serial stages of rDNA genetic/epigenetic and transcriptional modifications, as indicated by vertical bars for two haplotypes (broken: hypomethylated; solid: hypermethylated) in multiple chromosomes (Chr.) and helical lines, respectively. These rDNA activities, including copy number changes, are driven by distinct stage-dependent ontogenic stimulants, represented by arrows with diverse textures. doi:10.1371/journal.pone.0022266.g007

**Data S3 Paired T test of tissue versus tissue and mixed-effects model of pairwise comparisons of treatments.** (DOC)

**Acknowledgments**

The authors would like to thank Pritesh Patel and Paolo Fortina of Thomas Jefferson University, and Kathleen Hartman, Patricia Johnson, and Steven Shema of National Cancer Institute Mini-Core, for pyrosequencing services. We are also grateful to Deborah Litman, Margery Doyle, and Liying Yan of Biotage, for initial testing of pyrosequencing, and Laboratory of Molecular Technology, SAIC-Frederick, for dideoxy DNA sequencing. We appreciate our colleagues, Howard Young, Nancy Colburn, Alan

Perantoni, and Michael Dean for critical reading of the manuscript. The content of this publication does not necessarily reflect the views or policies of the Department of Health and Human Services, nor does mention of trade names, commercial products, or organizations imply endorsement by the U.S. Government.

**Author Contributions**

Conceived and designed the experiments: Y-HS KSK GST LMA. Performed the experiments: Y-HS CW XG EBC JMS SDM JRF LF LR CD REW. Analyzed the data: Y-HS RML OAQ WGA. Wrote the paper: Y-HS RML WGA LMA.

**References**

- Bostock CJ (1984) Chromosomal changes associated with changes in development. *J Embryol Exp Morph* 83 suppl: 7–30.
- Borst P, Greaves DR (1987) Programmed gene rearrangements altering gene expression. *Science* 235: 658–667.
- Rando OJ, Verstrepen KJ (2007) Timescales of genetic and epigenetic inheritance. *Cell* 128: 655–668.
- Badyaev AV (2005) Stress-induced variation in evolution: from behavioural plasticity to genetic assimilation. *Proc R Soc B* 272: 877–886.
- Jablonka E, Raz G (2009) Transgenerational epigenetic inheritance: prevalence, mechanisms, and implications for the study of heredity and evolution. *Quart Rev Biol* 84: 131–155.
- Long EO, Dawid IB (1980) Repeated Genes in Eukaryotes. *Ann Rev Biochem* 49: 727–764.
- Eickbush TH, Eickbush DG (2007) Finely orchestrated movements: evolution of the ribosomal RNA genes. *Genetics* 175: 477–485.
- Stults DM, Killen MW, Pierce HH, Pierce AJ (2008) Genomic architecture and inheritance of human ribosomal RNA gene clusters. *Genome Res* 18: 13–18.
- Paredes S, Maggert K (2009) Ribosomal DNA contributes to global chromatin regulation. *Proc Natl Acad Sci USA* 106: 17829–17834.
- Yu W, Sipowicz MA, Haines DC, Birely L, Diwan BA, et al. (1999) Preconceptional urethane or chromium(III) treatment of male mice: multiple neoplastic and non-neoplastic changes in offspring. *Toxicol Appl Pharmacol* 158: 161–176.
- Cheng RYS, Hockman T, Crawford E, Anderson LM, Shiao YH (2004) Epigenetic and gene expression changes related to transgenerational carcinogenesis. *Mol Carcinog* 40: 1–11.
- Mertz W (1993) Chromium in human nutrition: a review. *J Nutr* 123: 626–633.
- Tjong HL, Swart R, van den Berg JW, Fieren MW (2009) Amino acid-based peritoneal dialysis solutions for malnutrition: new perspectives. *Perit Dial Int* 29: 384–393.
- Shiao YH (2010) Genotyping of multi-copy genes by pyrosequencing. *Ming-Chuan Health Tech J* 1: e2. Available: <http://biotech.mcu.edu.tw/ojs/index.php/MC-HTJ>.
- Ahmadian A, Ehn M, Hober S (2006) Pyrosequencing: history, biochemistry and future. *Clin Chim Acta* 363: 83–94.
- Grummt I, Pikaard CS (2003) Epigenetic silencing of RNA polymerase I transcription. *Nat Rev Mol Cell Biol* 4: 641–649.
- Shiao YH, Crawford EB, Anderson LM, Patel P, Ko K (2005) Allele-specific germ cell epimutation in the spacer promoter of the 45S ribosomal RNA gene after Cr(III) exposure. *Toxicol Appl Pharmacol* 205: 290–296.
- Feinberg AP, Irizarry RA (2010) Stochastic epigenetic variation as a driving force of development, evolutionary adaptation, and disease. *Proc Natl Acad Sci USA* 107: 1757–1764.
- Santoro R, Grummt I (2001) Molecular mechanisms mediating methylation-dependent silencing of ribosomal gene transcription. *Mol Cell* 8: 719–725.

20. Laferte A, Favry E, Sentenac A, Riva M, Carles C, et al. (2006) The transcriptional activity of RNA polymerase I is a key determinant for the level of all ribosomal components. *Genes Dev* 20: 2030–2040.
21. Young DW, Hassan MQ, Pratap J, Galindo M, Zaidi S, et al. (2007) Mitotic occupancy and lineage-specific transcriptional control of rRNA genes by Runx2. *Nature* 445: 442–446.
22. Fichelson P, Moch C, Ivanovitch K, Martin C, Sidor CM, et al. (2009) Live-imaging of single stem cells within their niche reveals that a U3snoRNP component segregates asymmetrically and is required for self-renewal in *Drosophila*. *Nat Cell Biol* 11: 685–693.
23. White RJ (2008) RNA polymerases I and III, non-coding RNAs and cancer. *Trends Genet* 24: 622–629.
24. Gagnon-Kugler T, Langlois F, Stefanovsky V, Lessard F, Moss T (2009) Loss of human ribosomal gene CpG methylation enhances cryptic RNA polymerase II transcription and disrupts ribosomal RNA processing. *Mol Cell* 35: 414–425.
25. Shiratori M, Suzuki T, Itoh C, Goto M, Furuichi Y, et al. (2002) WRN helicase accelerates the transcription of ribosomal RNA as a component of an RNA polymerase I-associated complex. *Oncogene* 21: 2447–2454.
26. Honda K, Smith MA, Zhu X, Baus D, Merrick WC, et al. (2005) Ribosomal RNA in Alzheimer disease is oxidized by bound redox-active iron. *J Biol Chem* 280: 20978–20986.
27. Parlato R, Kreiner G, Erdmann G, Rieker C, Stotz S, et al. (2008) Activation of an endogenous suicide response after perturbation of rRNA synthesis leads to neurodegeneration in mice. *J Neurosci* 28: 12759–12764.
28. McGowan PO, Sasaki A, Huang TC, Unterberger A, Suderman M, et al. (2008) Promoter-wide hypermethylation of the ribosomal RNA gene promoter in the suicide brain. *PLoS One* 3: e2085.
29. Kobayashi T, Ganley ARD (2005) Recombination regulation by transcription-induced cohesin dissociation in rDNA repeats. *Science* 309: 1581–1584.
30. Cattanach BM, Papworth GP, Goodhead DT, Hacker T, Cobb L, et al. (1995) Investigation of lung tumour induction in BALB/cJ mice following paternal X-irradiation. *Int J Radiat Biol* 67: 607–615.
31. Shiao YH, Lupascu ST, Gu YD, Kasprzak W, Hwang CJ, et al. (2009) An intergenic non-coding rRNA correlated with expression of the rRNA and frequency of an rRNA single nucleotide polymorphism in lung cancer cells. *PLoS One* 4: e7505.
32. Kuhn A, Deppert U, Grummt I (1990) A 140-base-pair repetitive sequence element in the mouse rRNA gene spacer enhances transcription by RNA polymerase I in a cell-free system. *Proc Natl Acad Sci USA* 87: 7527–7531.
33. Littell RC, Milliken GA, Stroup WW, Wolfinger RD (1996) SAS System for Mixed Models SAS Institute, Inc.
34. Milliken GA, Johnson DE (1992) Analysis of Messy Data, Volume 1: Designed Experiments Chapman and Hall, New York.
35. Pinheiro JC, Bates DM (2000) Mixed-Effects Models in S and S-PLUS Springer-Verlag, New York.
